# Supplementary material
Source: PubMed Central journal article supplement (PMC4824861)
Supplement: supp_M115.051664_suppl5.pdf [file supp_M115.051664_suppl5.pdf]

**Supplementary File 5:** Heatmap visualization of CSF antibody reactivities.

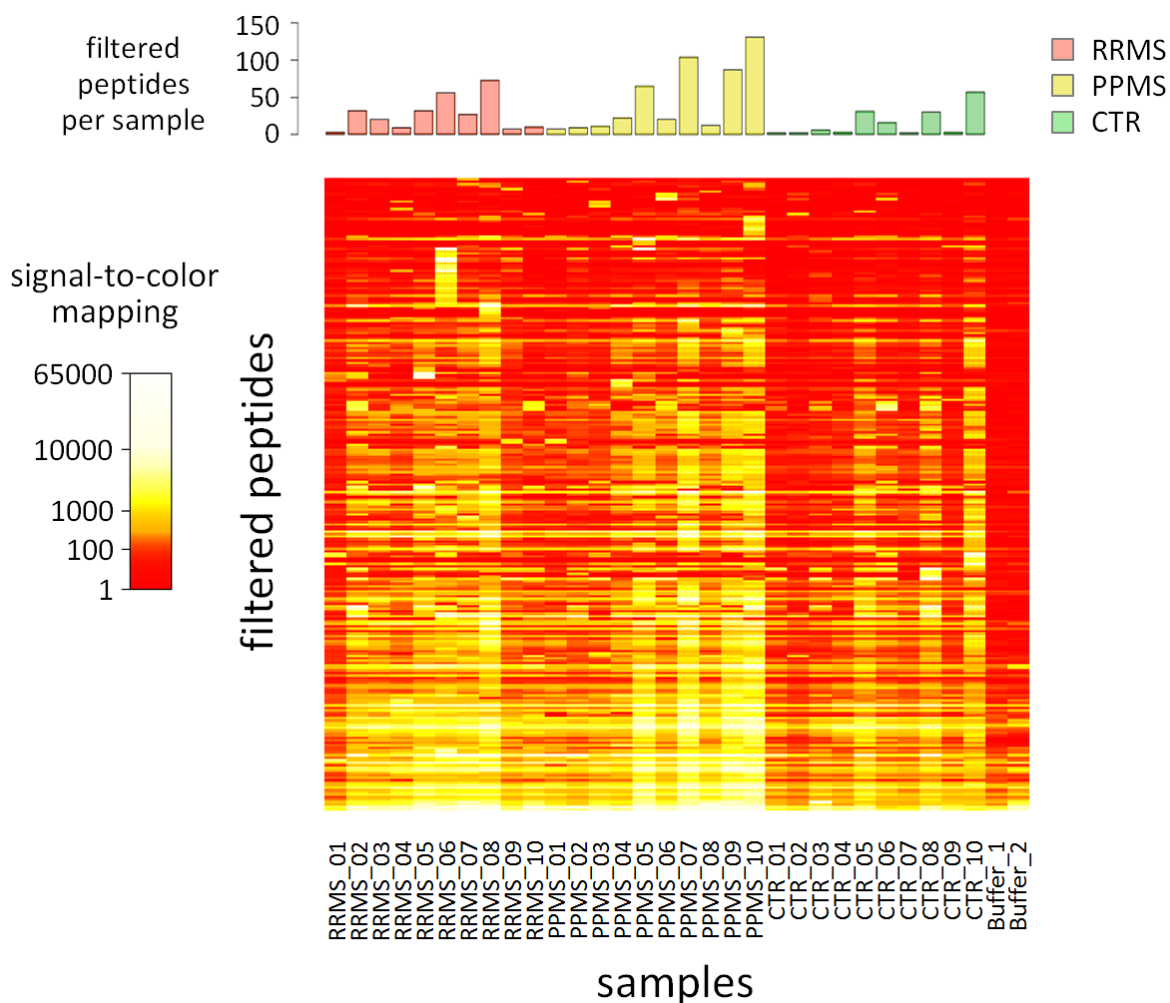

This heatmap shows the signal intensities in the CSF data set for 255 of the 3991 spotted peptides. These peptides were filtered as bound by IgG from at least one of the 30 CSF samples. Some peptides showed very high signals in different samples, but overall much less antibody reactivities were observed in CSF compared to serum (figure 4). The number of filtered peptides is displayed on top for each sample.
